# Supplementary material for: CodonBERT large language model for mRNA vaccines
Source: HighWire-hosted journal article supplement (doi:10.1101/gr.278870.123), 2024-07-01
Supplement: Supplemental_Material.zip [file CodonBERT_model.pdf › SI/figs/CodonBERT_model.pdf]

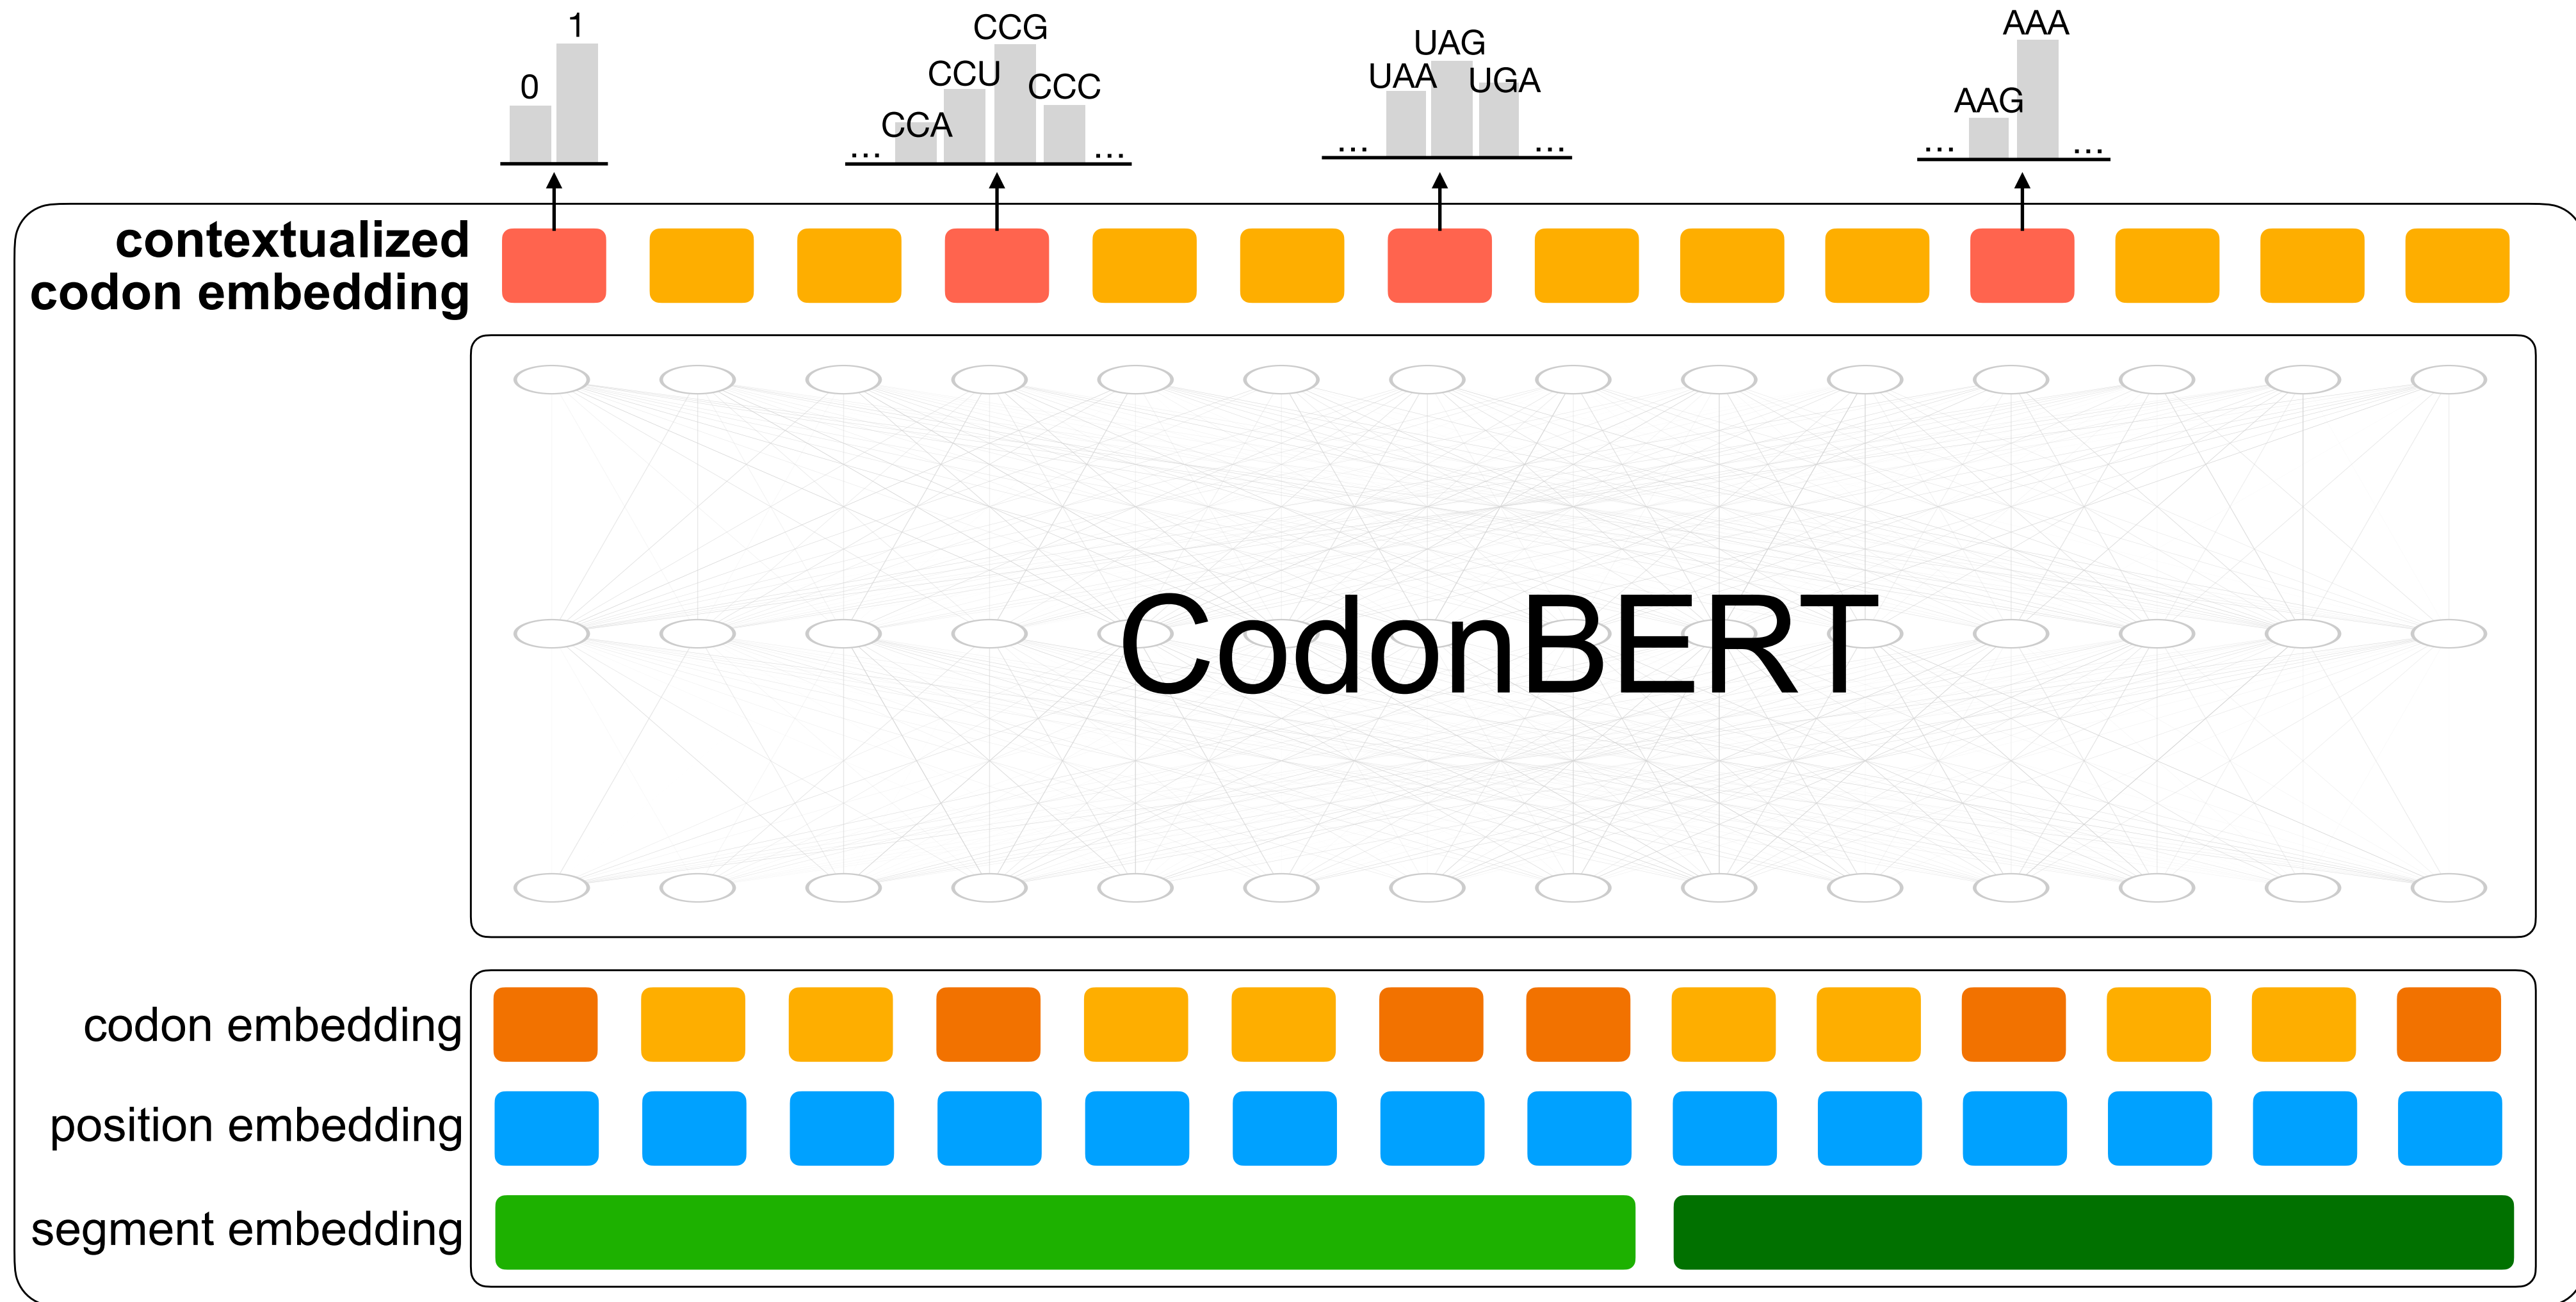

masked input: **[CLS]** AUG UUC **[MASK]** GUA AAG **[MASK]** **[SEP]** AUG GAG **[MASK]** UCA UAA **[SEP]**

codon: AUG UUC CCG GUA AAG UAG

AUG GAG AAA UCA UAA

sequence: AUGUUC**CCG**GUAAGUAG

AUGGAGAAAUCAUAA

taxonomy: primates

rodents
