# Supplementary figures and images for: CodonBERT large language model for mRNA vaccines
Source: HighWire-hosted journal article supplement (doi:10.1101/gr.278870.123), 2024-07-01

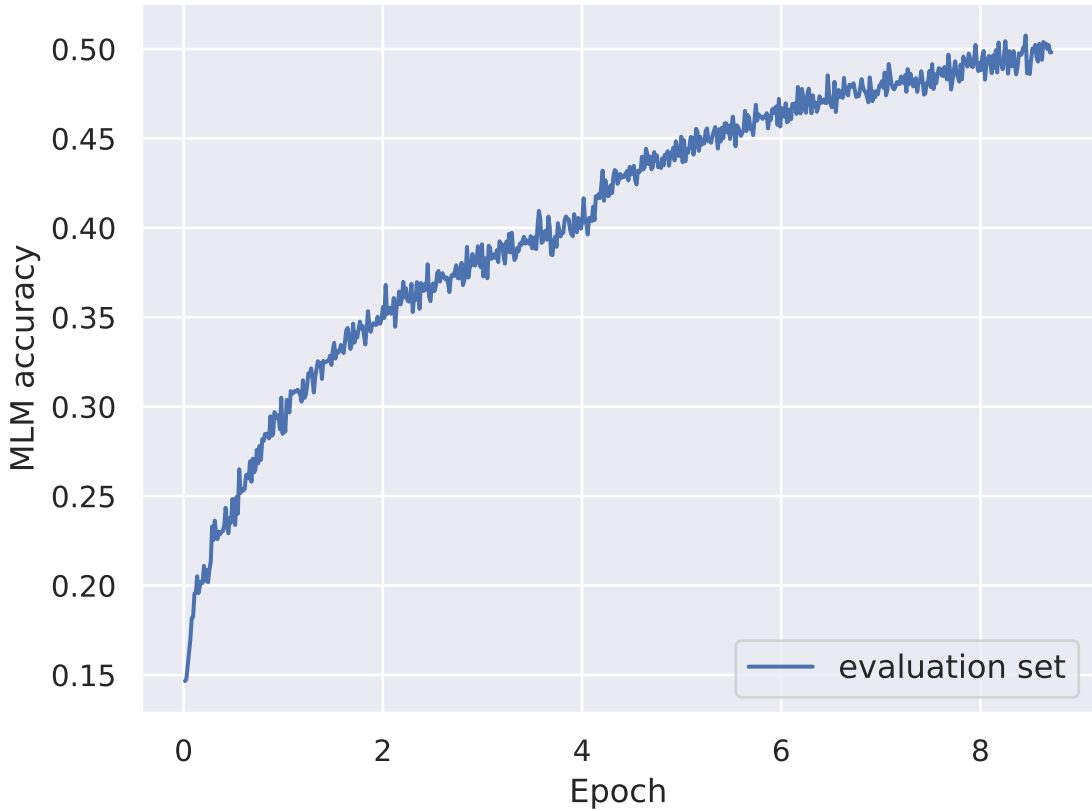

Supplement: Supplemental_Material.zip [file MLM_eval_mlm_acc.pdf › SI/figs/MLM_eval_mlm_acc.pdf]

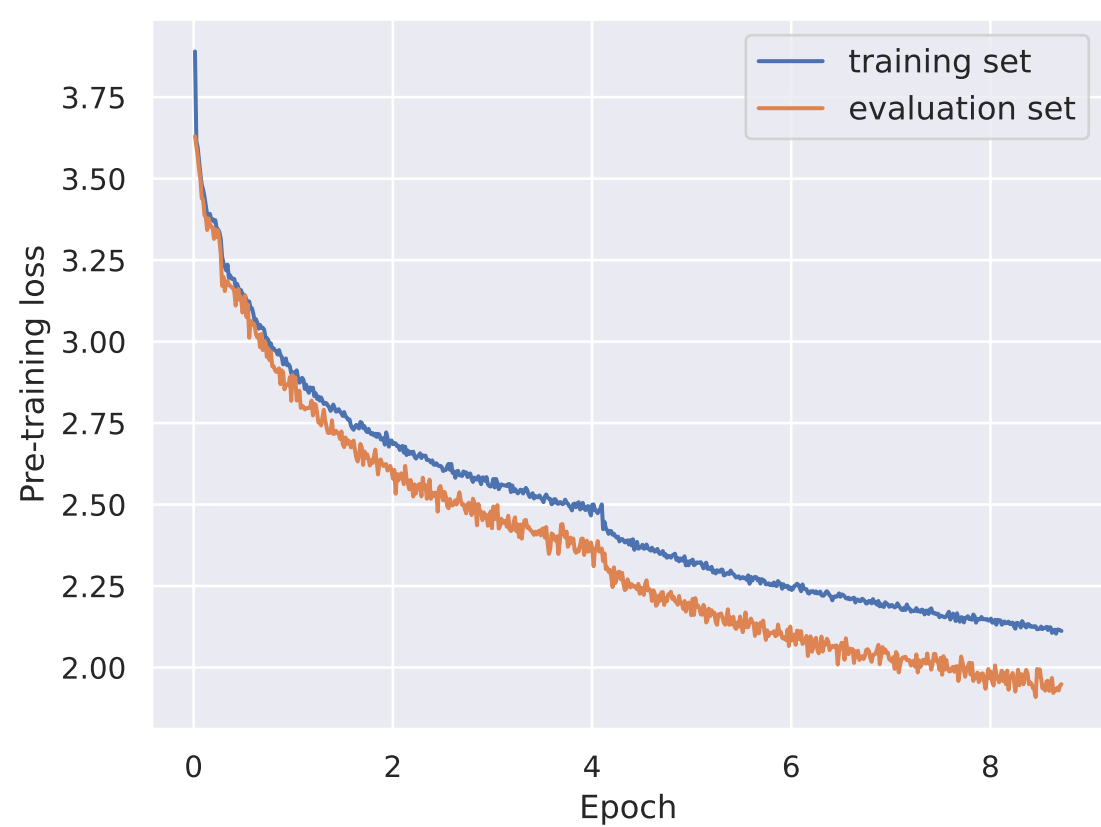

Supplement: Supplemental_Material.zip [file MLM_train_loss.pdf › SI/figs/MLM_train_loss.pdf]

UMAP Dimension 2

UMAP Dimension 1

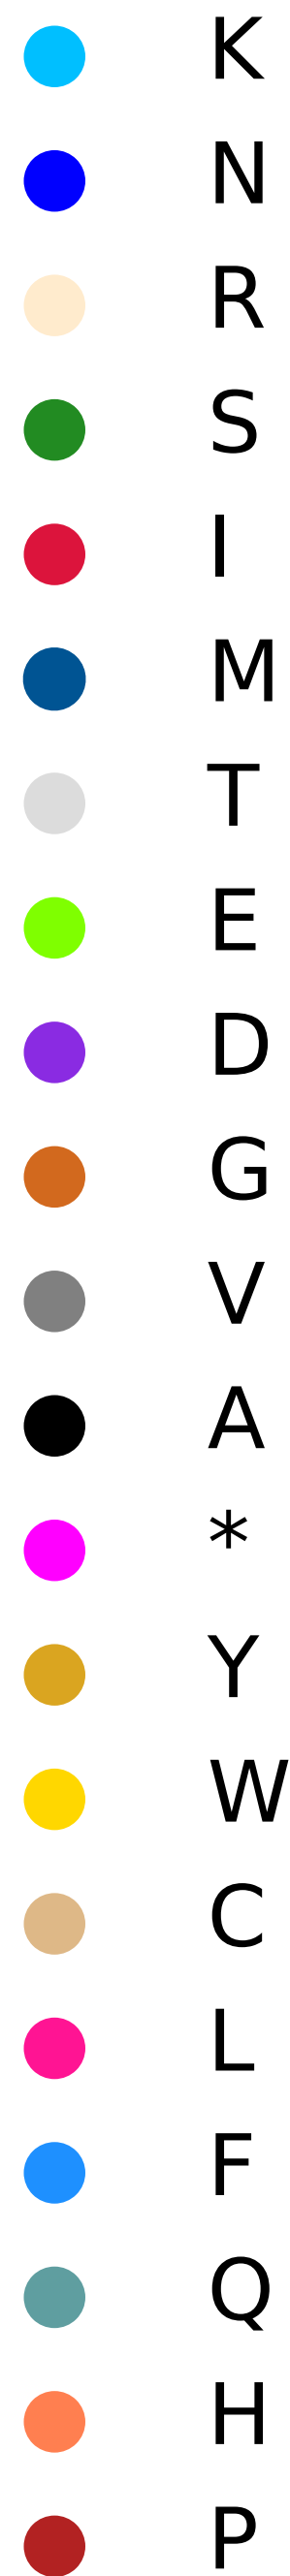

Supplement: Supplemental_Material.zip [file aa_cluster2.pdf › SI/figs/aa_cluster2.pdf]

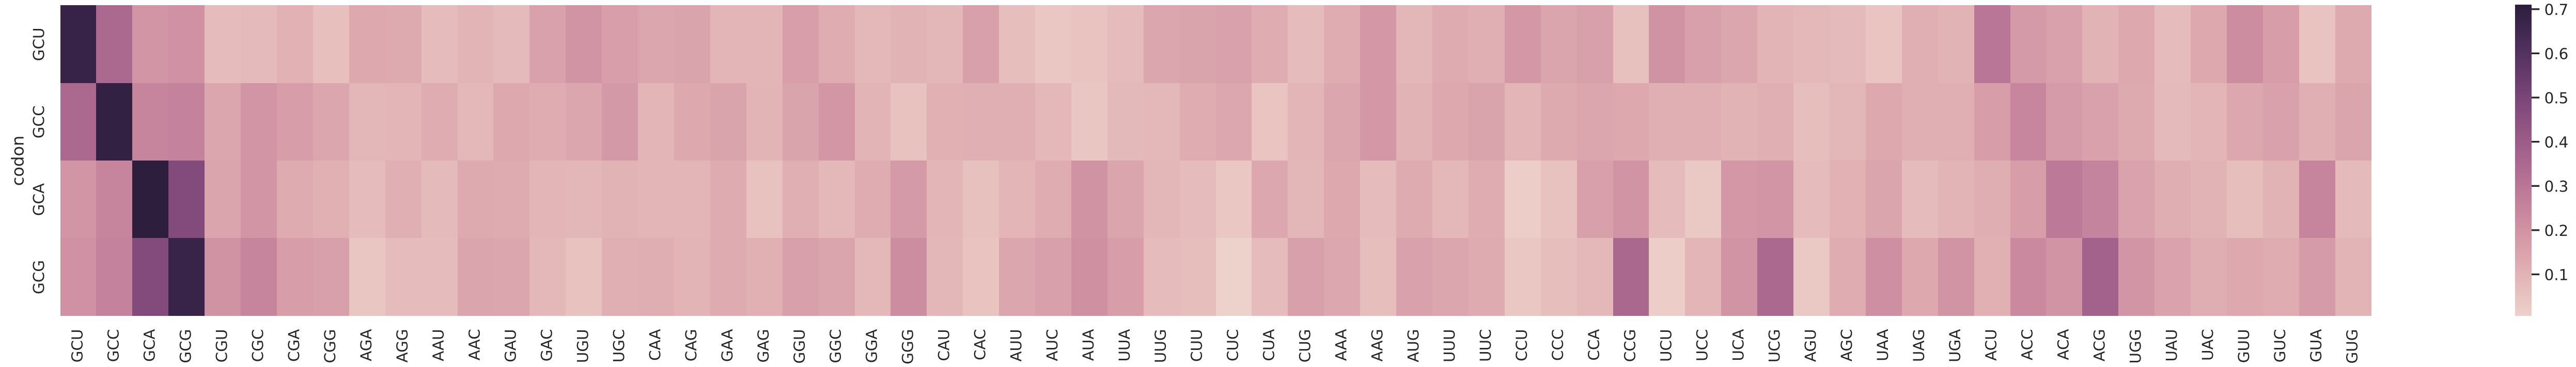

Supplement: Supplemental_Material.zip [file codon.dist.pdf › SI/figs/codon.dist.pdf]

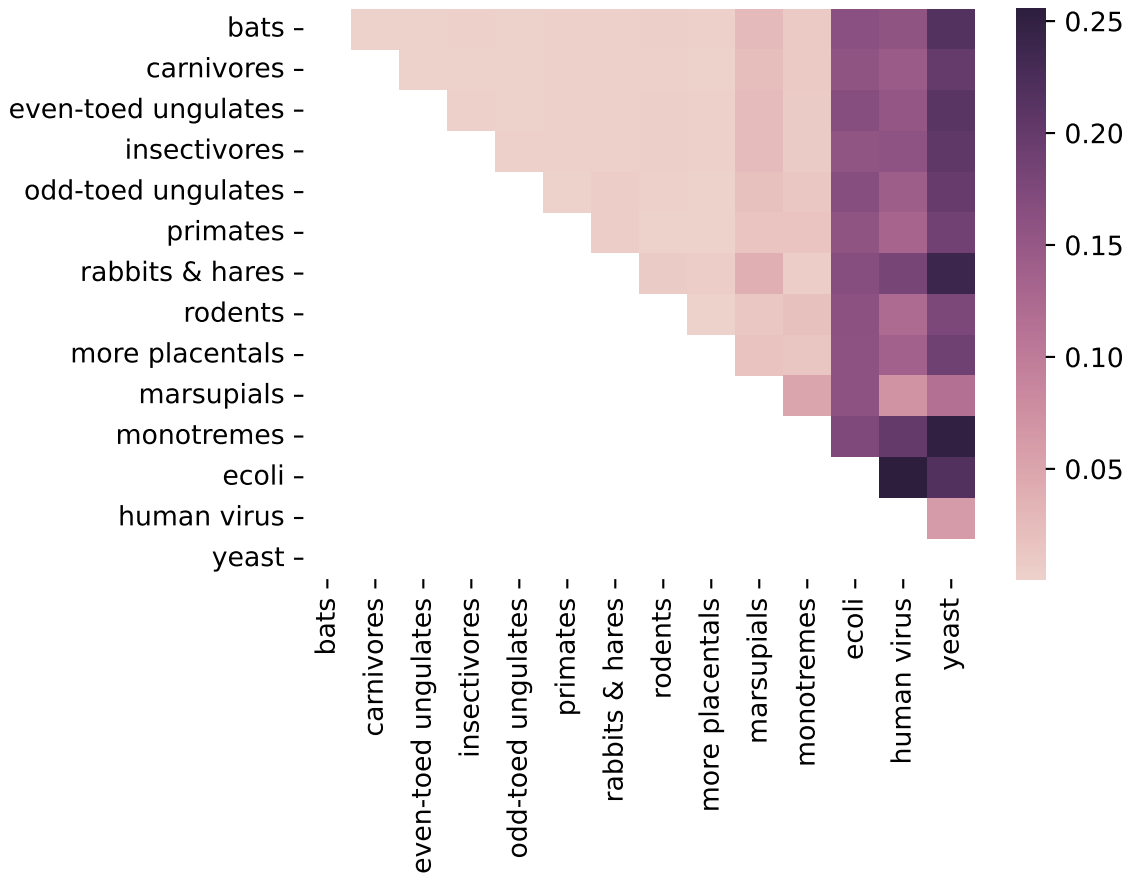

Supplement: Supplemental_Material.zip [file codonusage.kldiv.pdf › SI/figs/codonusage.kldiv.pdf]

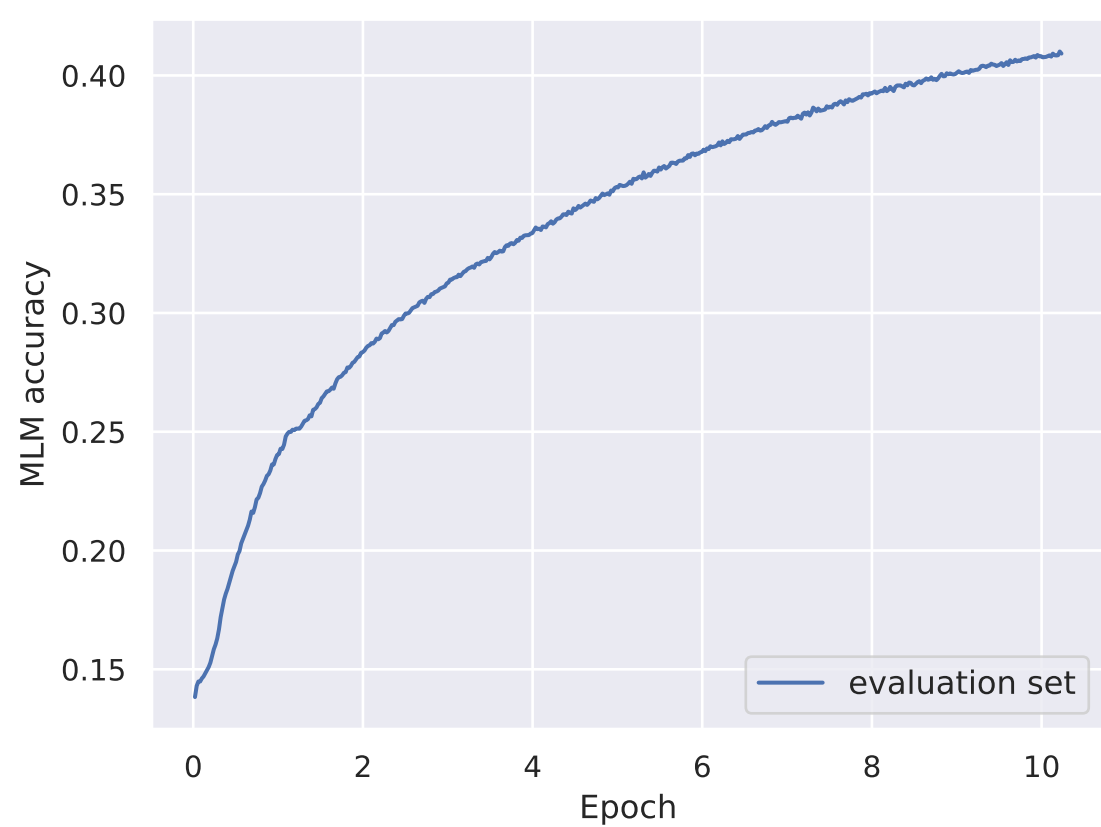

Supplement: Supplemental_Material.zip [file eval_mlm_acc.pdf › SI/figs/eval_mlm_acc.pdf]

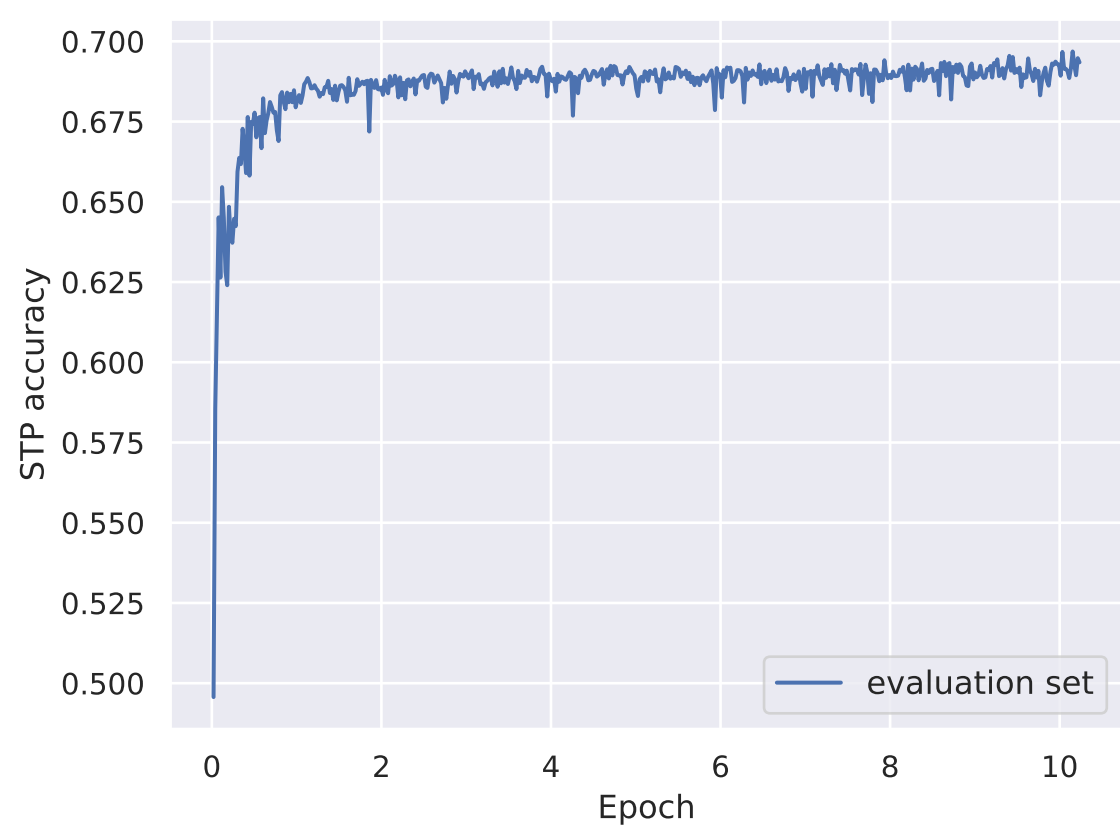

Supplement: Supplemental_Material.zip [file eval_stp_acc.pdf › SI/figs/eval_stp_acc.pdf]

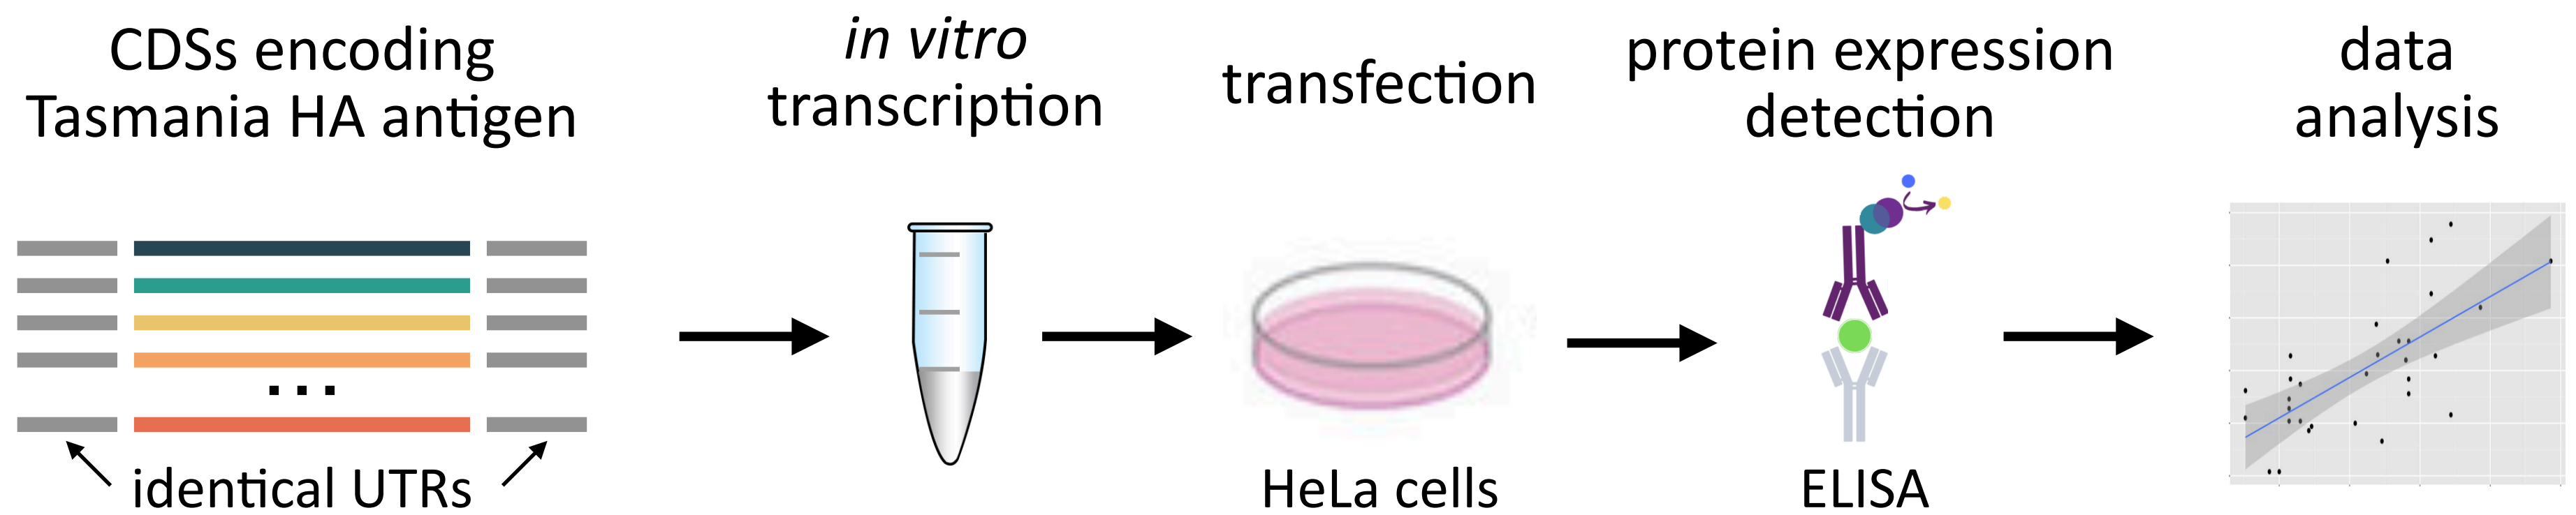

Supplement: Supplemental_Material.zip [file exprimental_design.pdf › SI/figs/exprimental_design.pdf]

**A**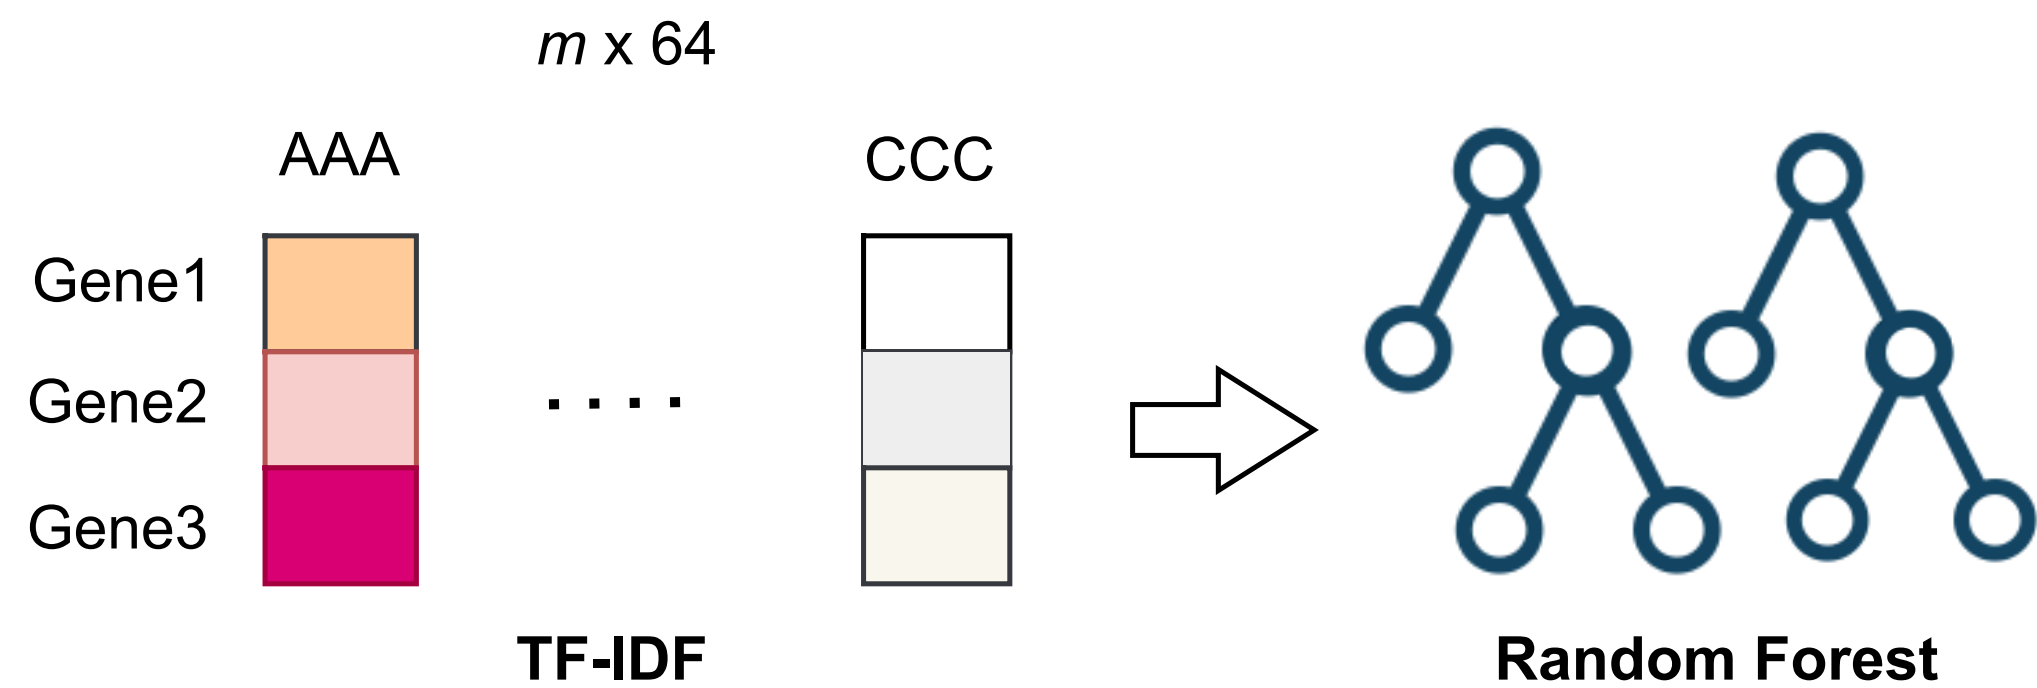**B**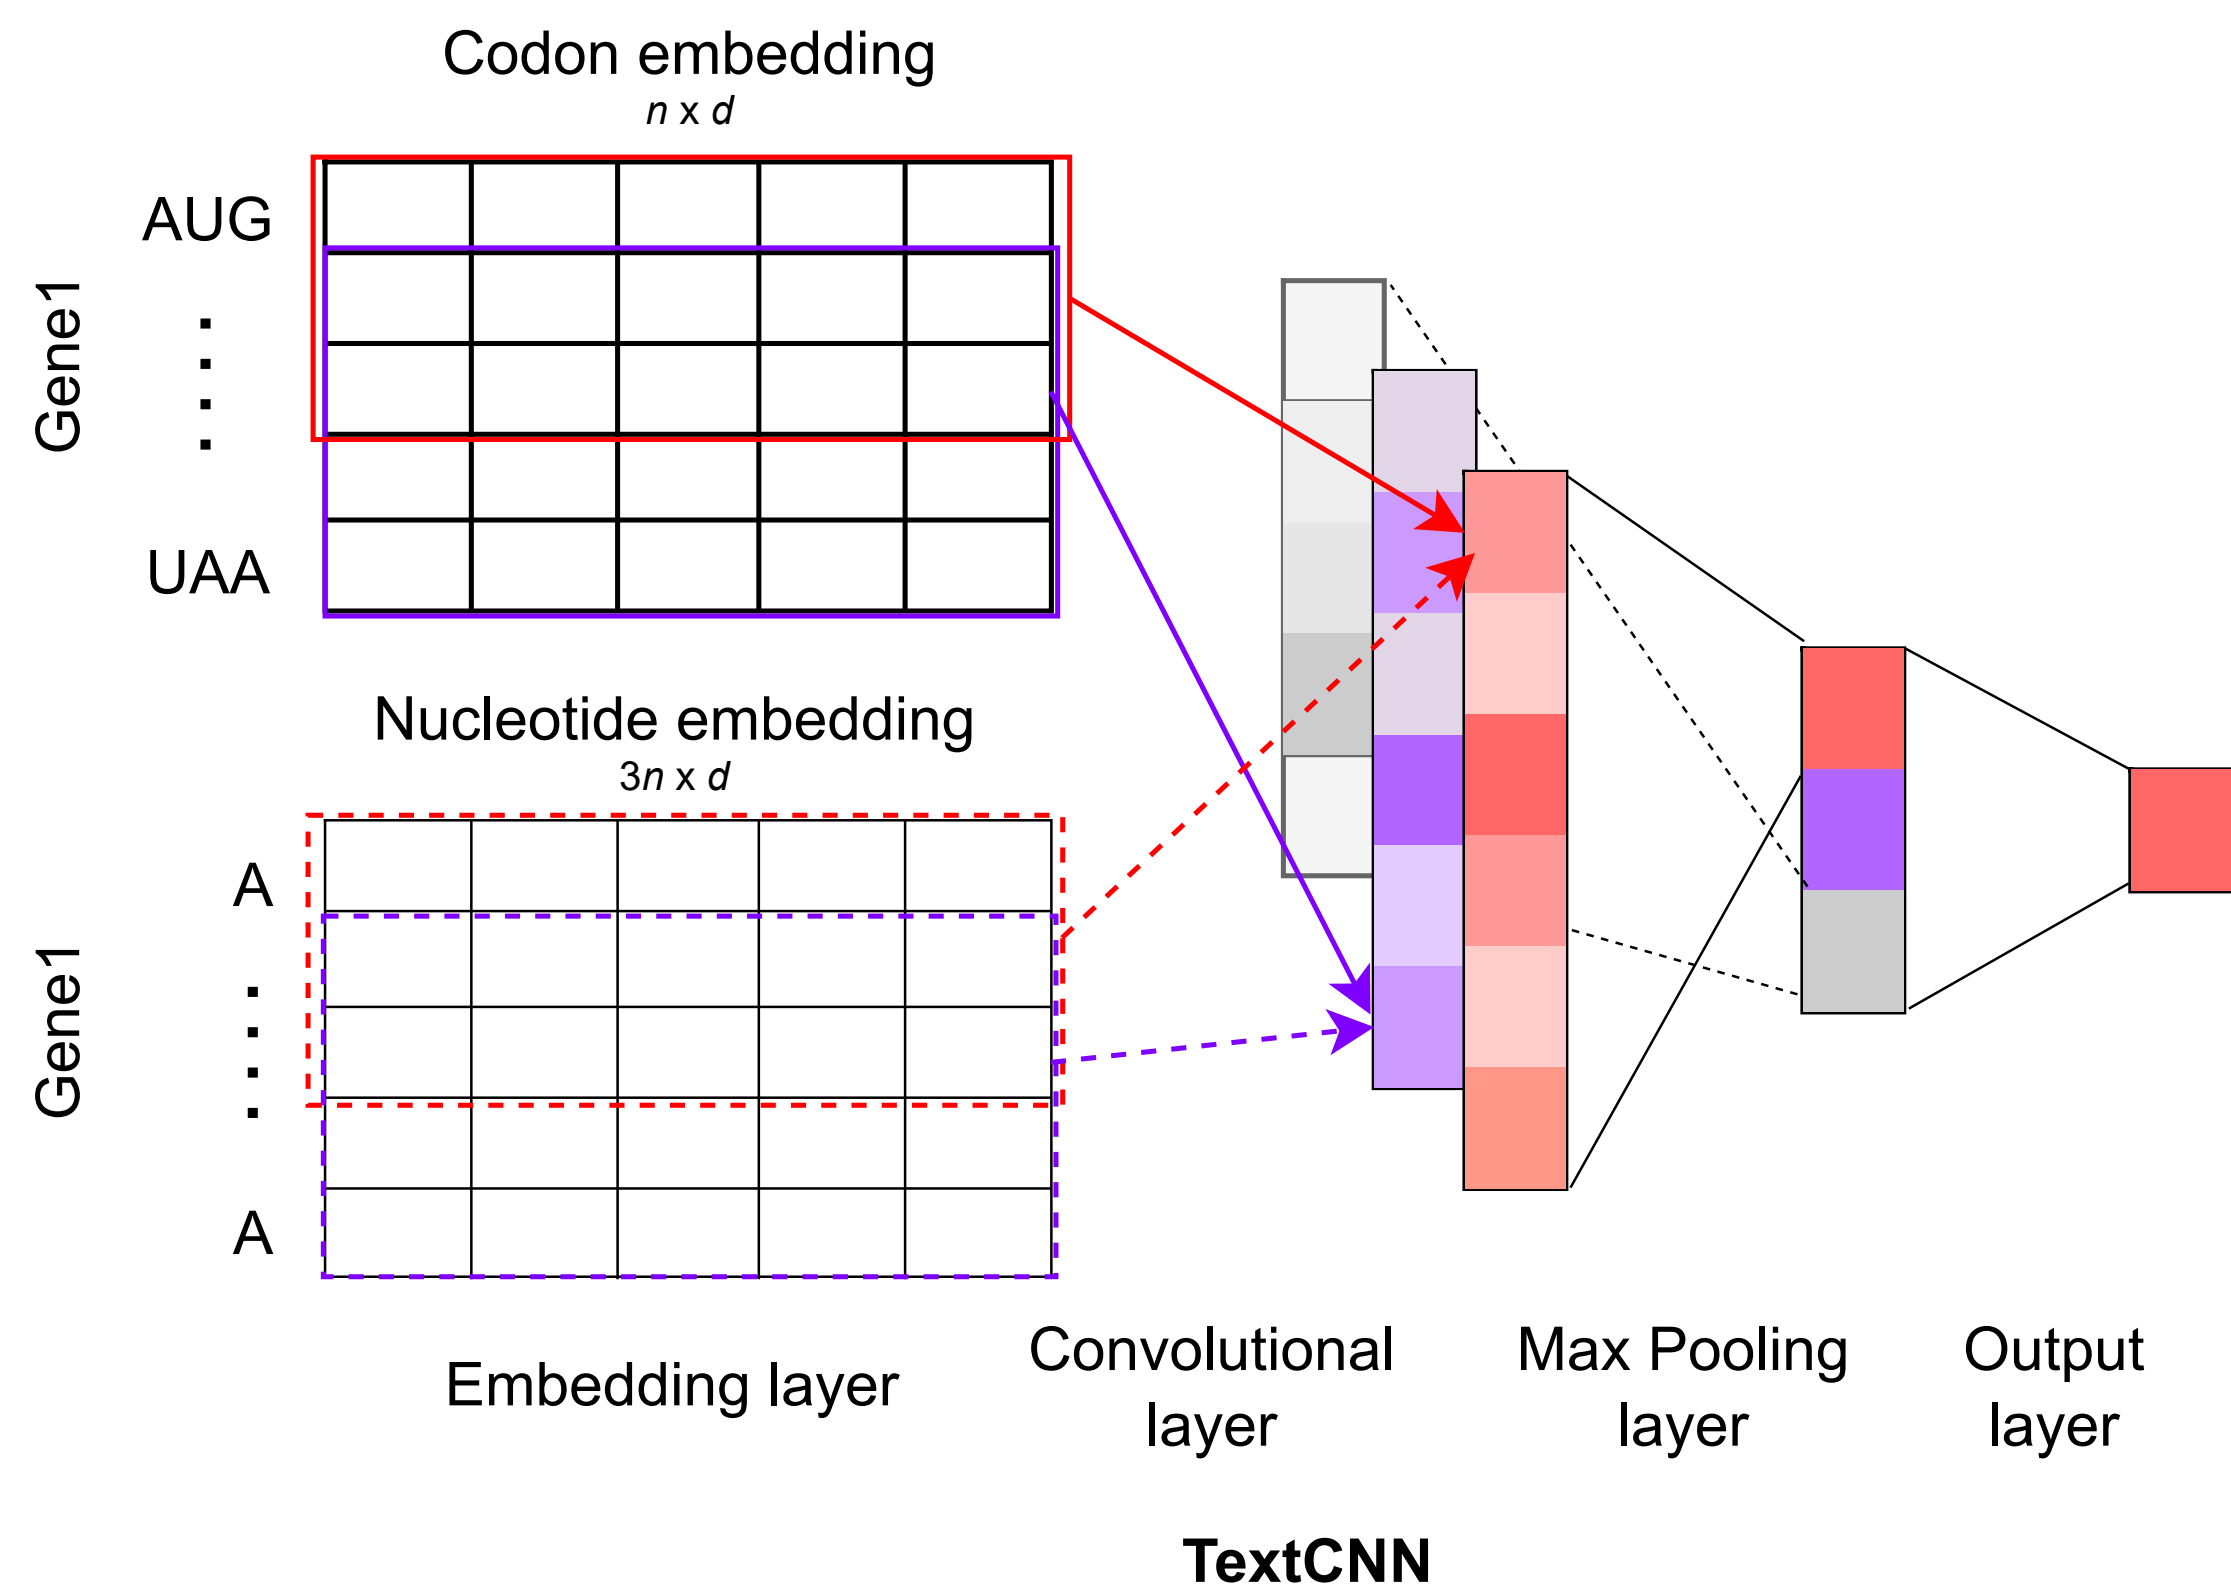**C**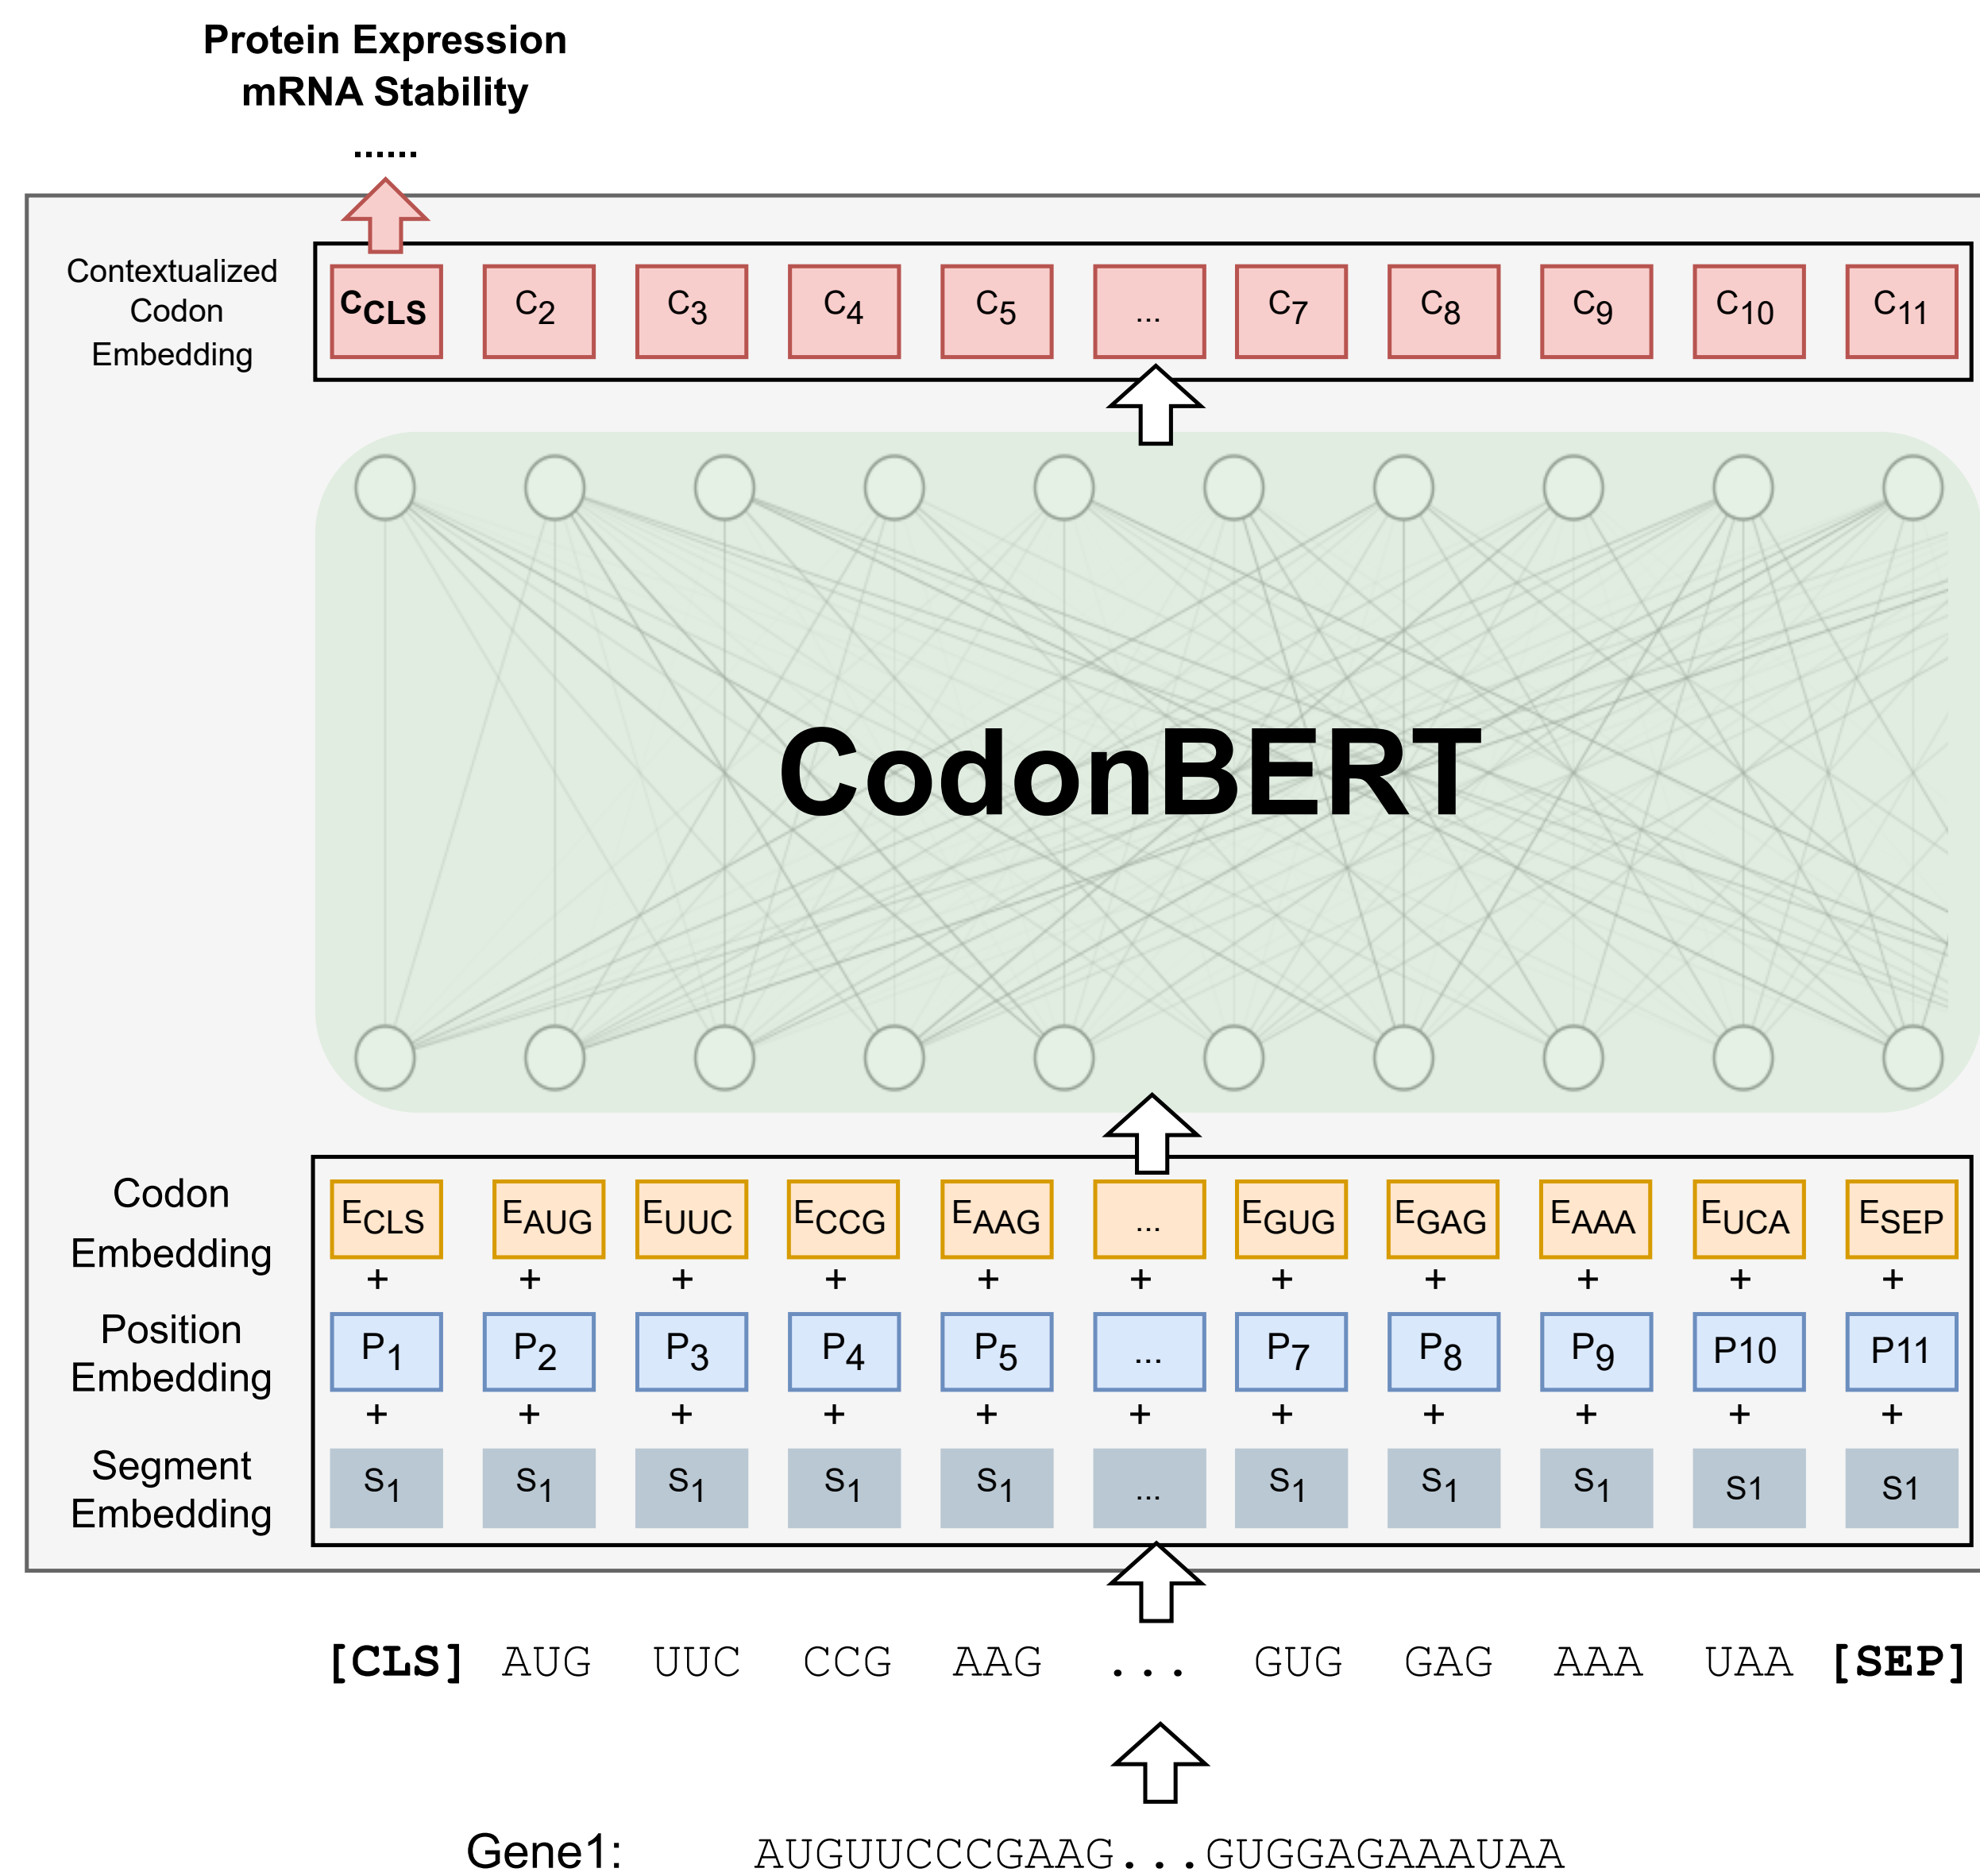

Supplement: Supplemental_Material.zip [file pipeline.pdf › SI/figs/pipeline.pdf]

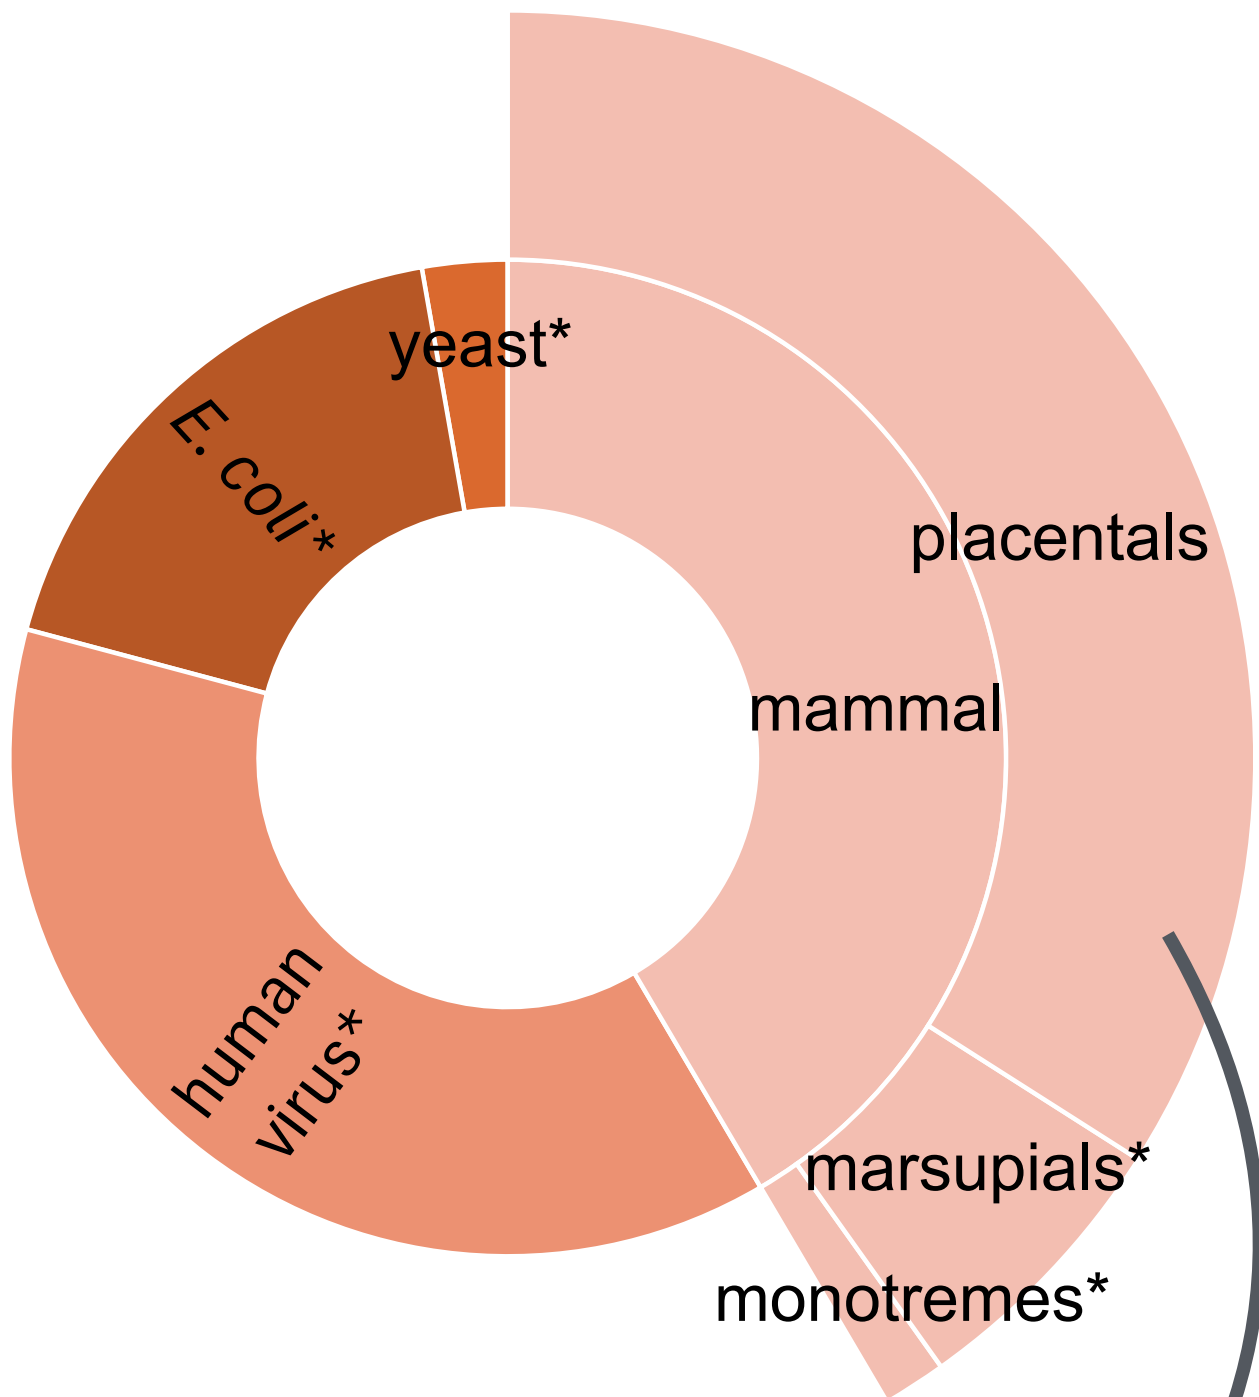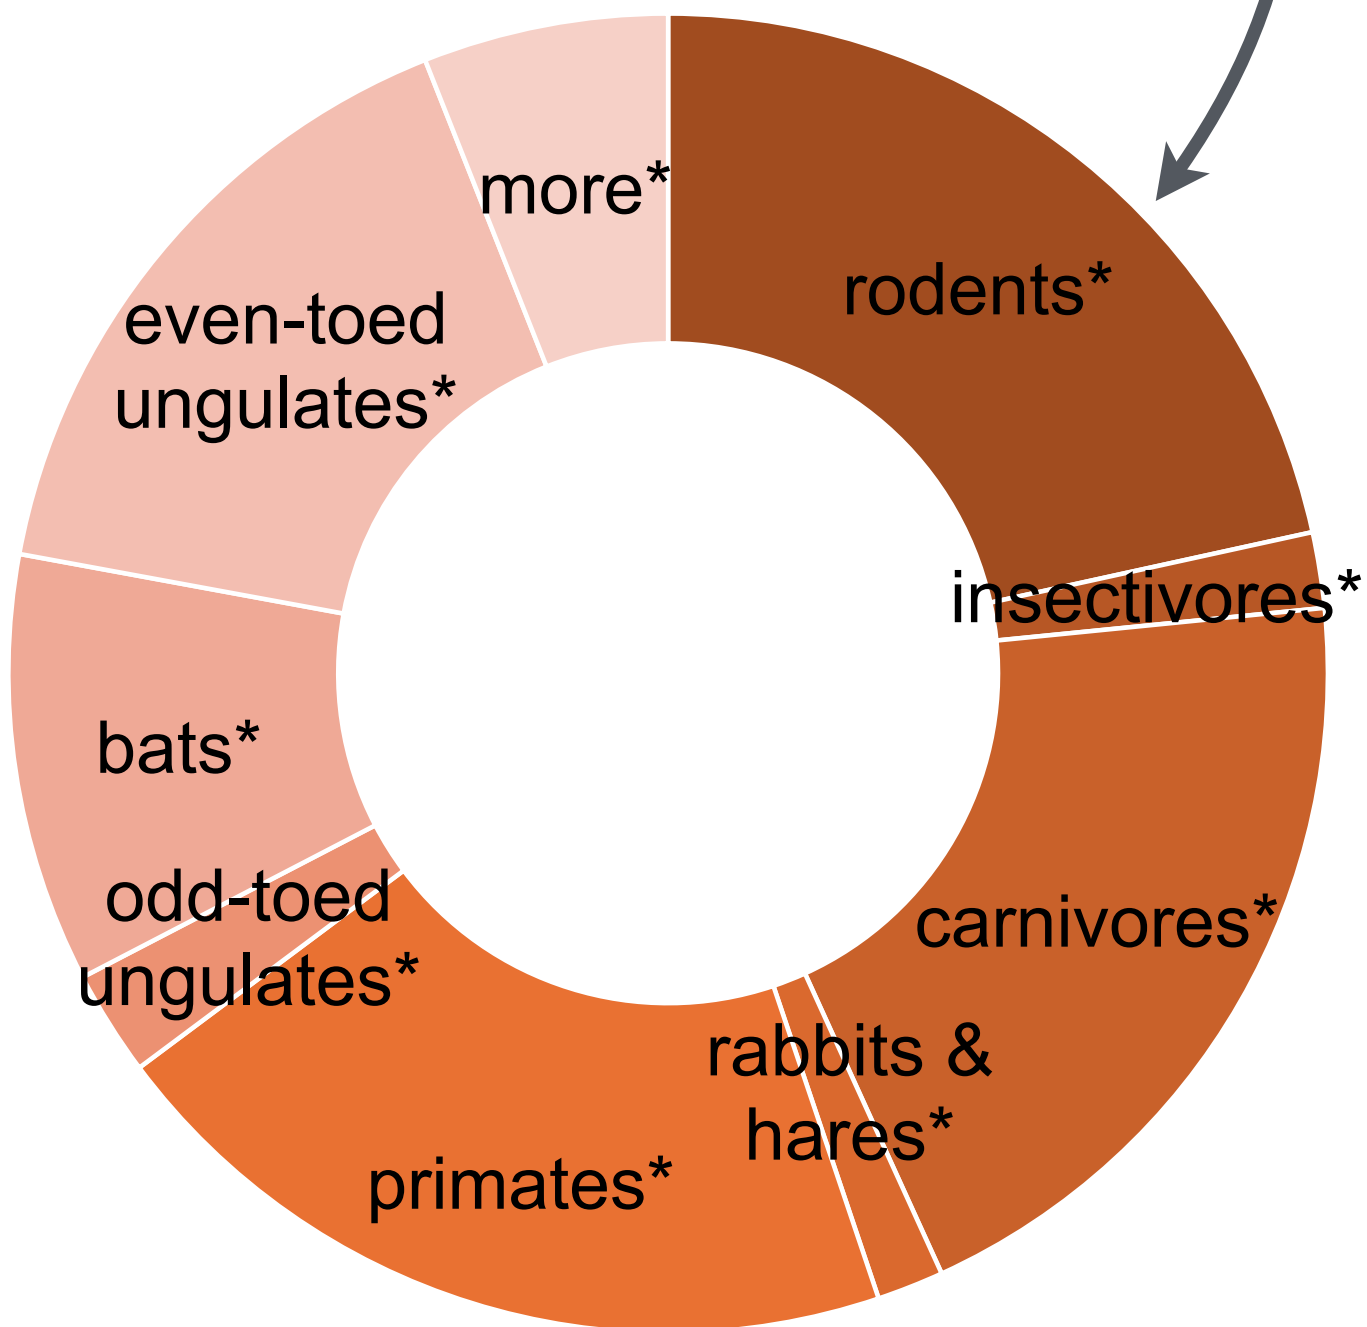

Supplement: Supplemental_Material.zip [file pretrain_data.pdf › SI/figs/pretrain_data.pdf]

UMAP Dimension 2

UMAP Dimension 1

- Mammal
- × *E. coli*
- Human virus
- + Yeast

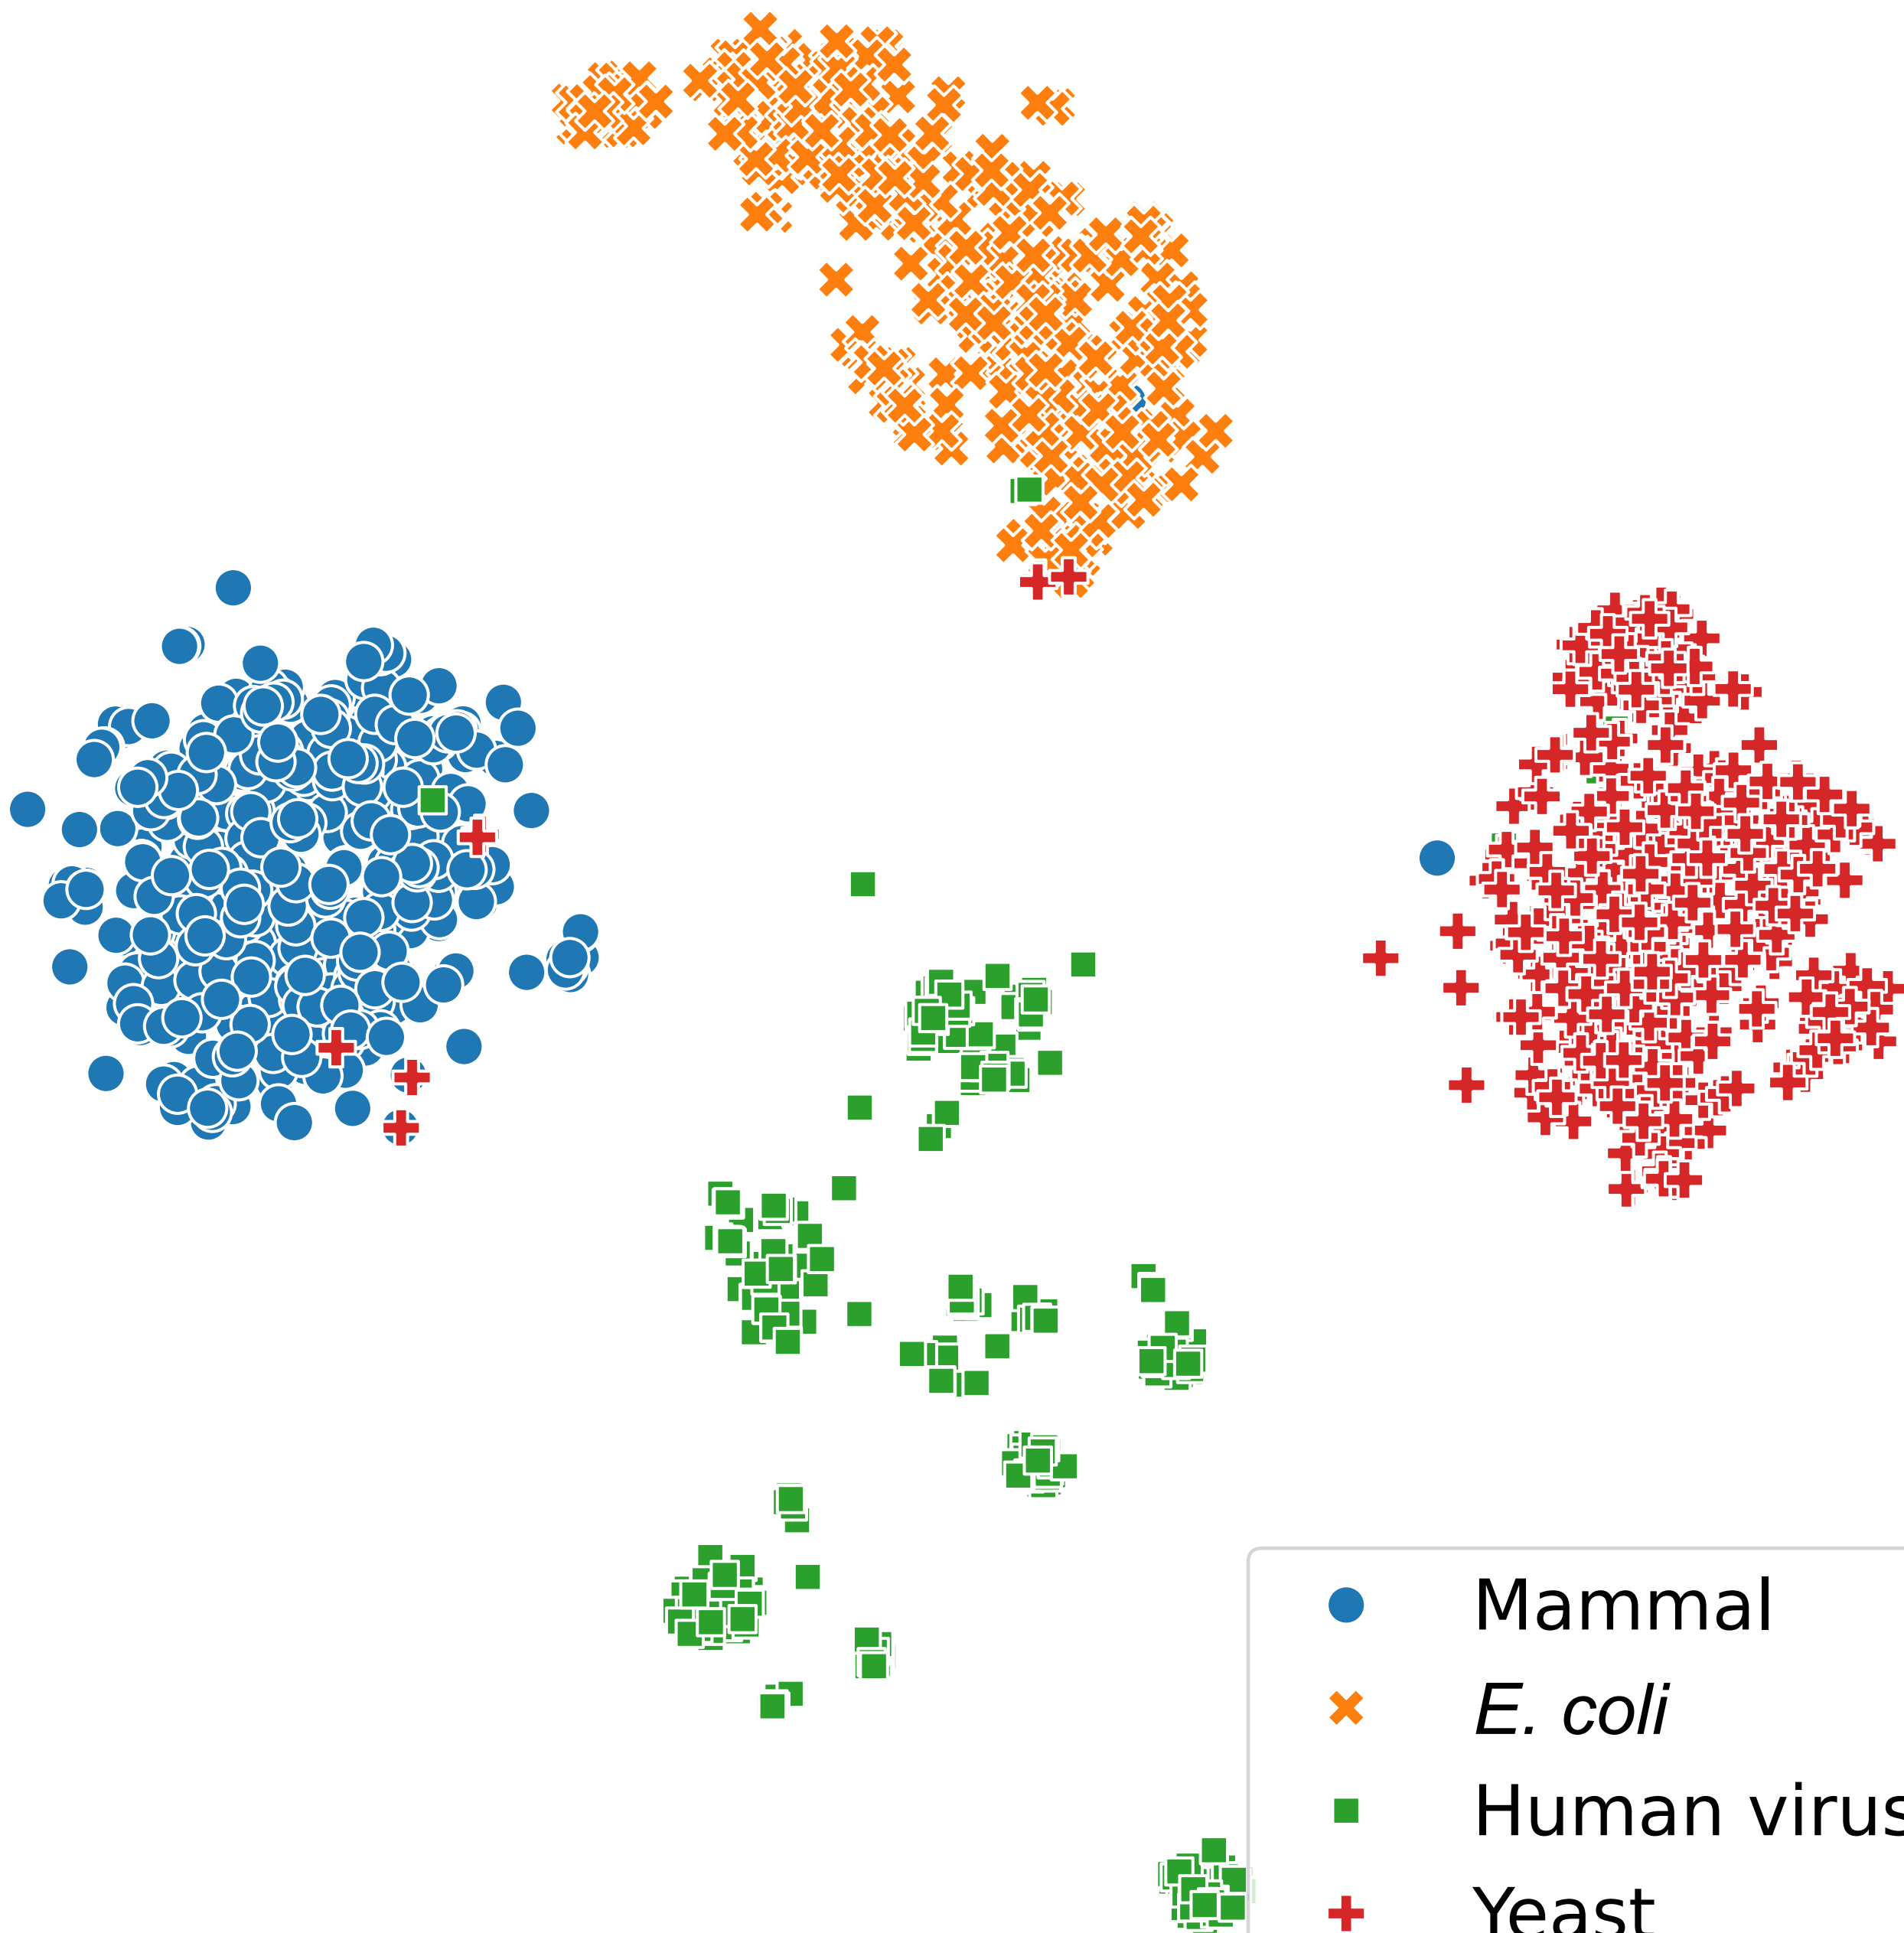

Supplement: Supplemental_Material.zip [file seq.4class.tsne.2.pdf › SI/figs/seq.4class.tsne.2.pdf]

UMAP Dimension 2

- placentals
- ✕ marsupials
- monotremes

UMAP Dimension 1

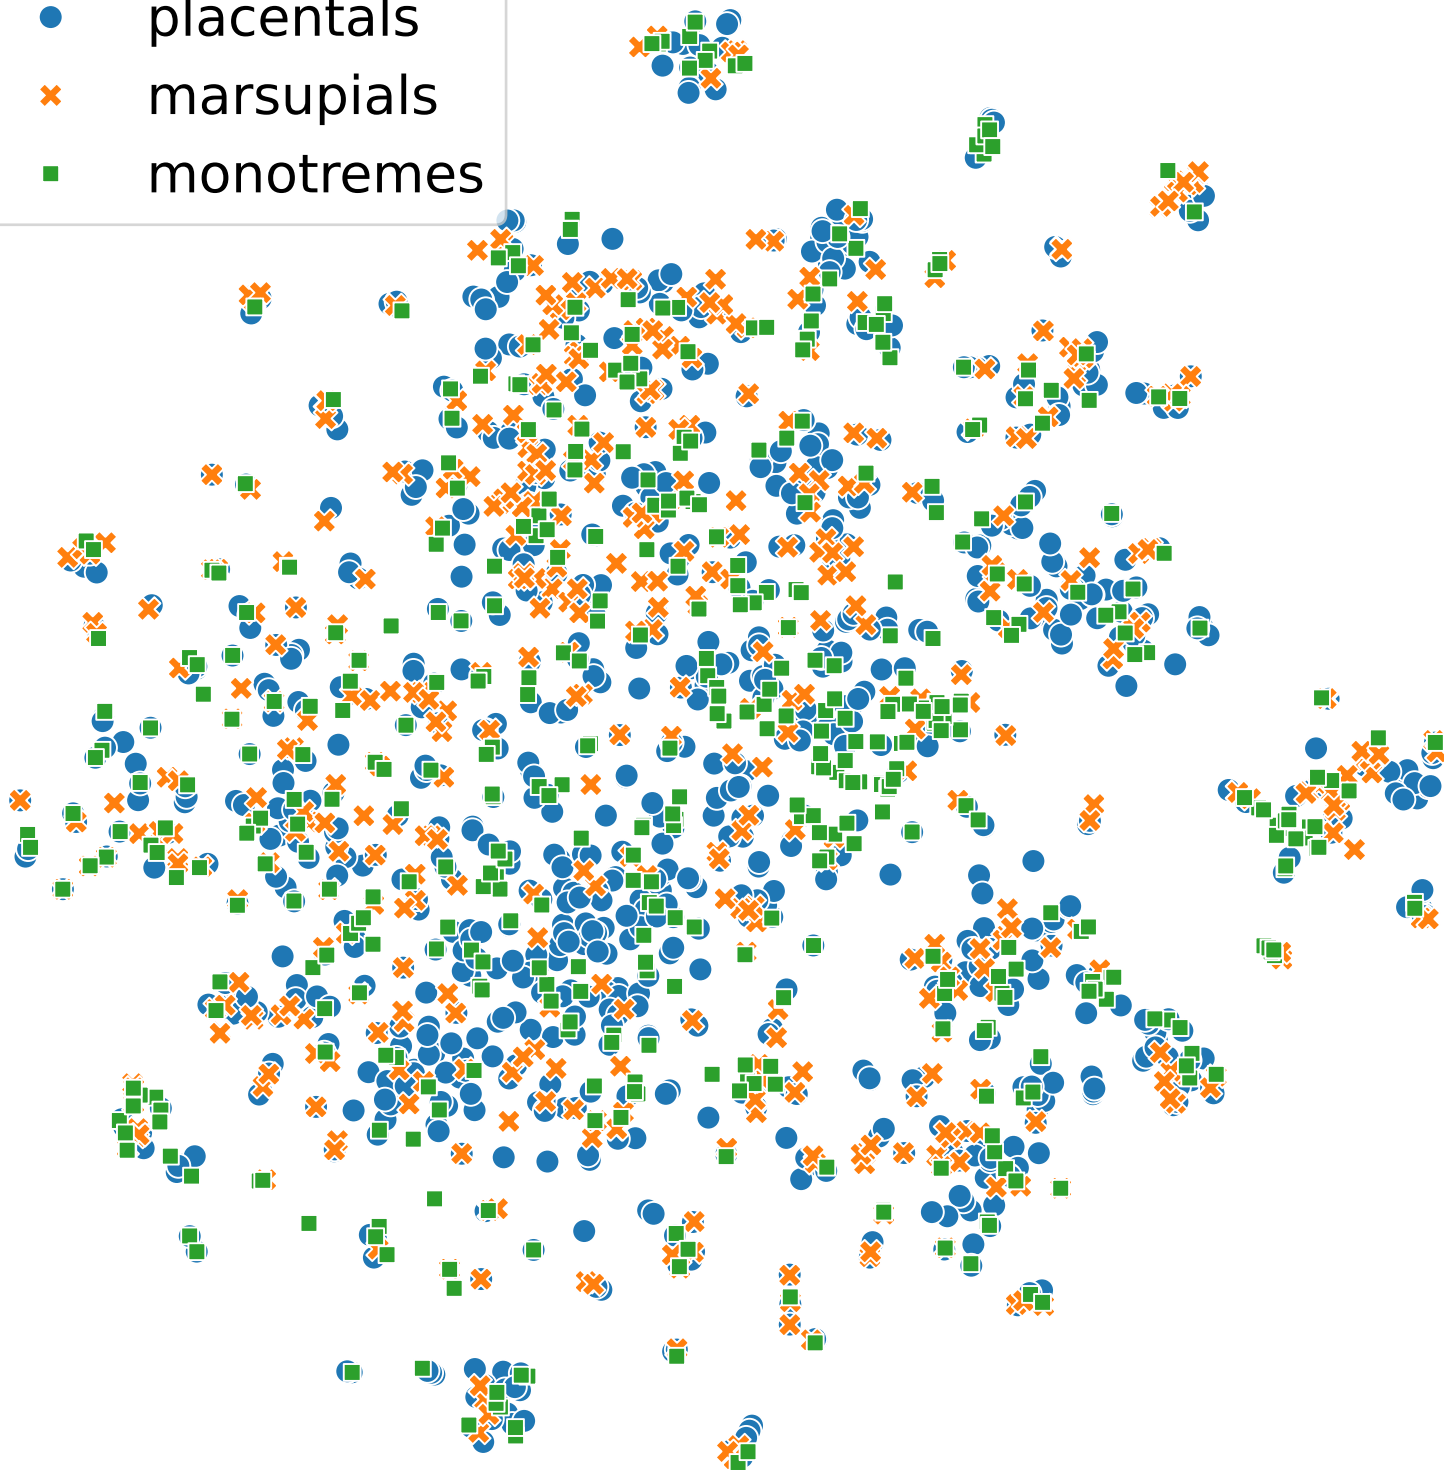

Supplement: Supplemental_Material.zip [file seq.class.2.tsne.pdf › SI/figs/seq.class.2.tsne.pdf]

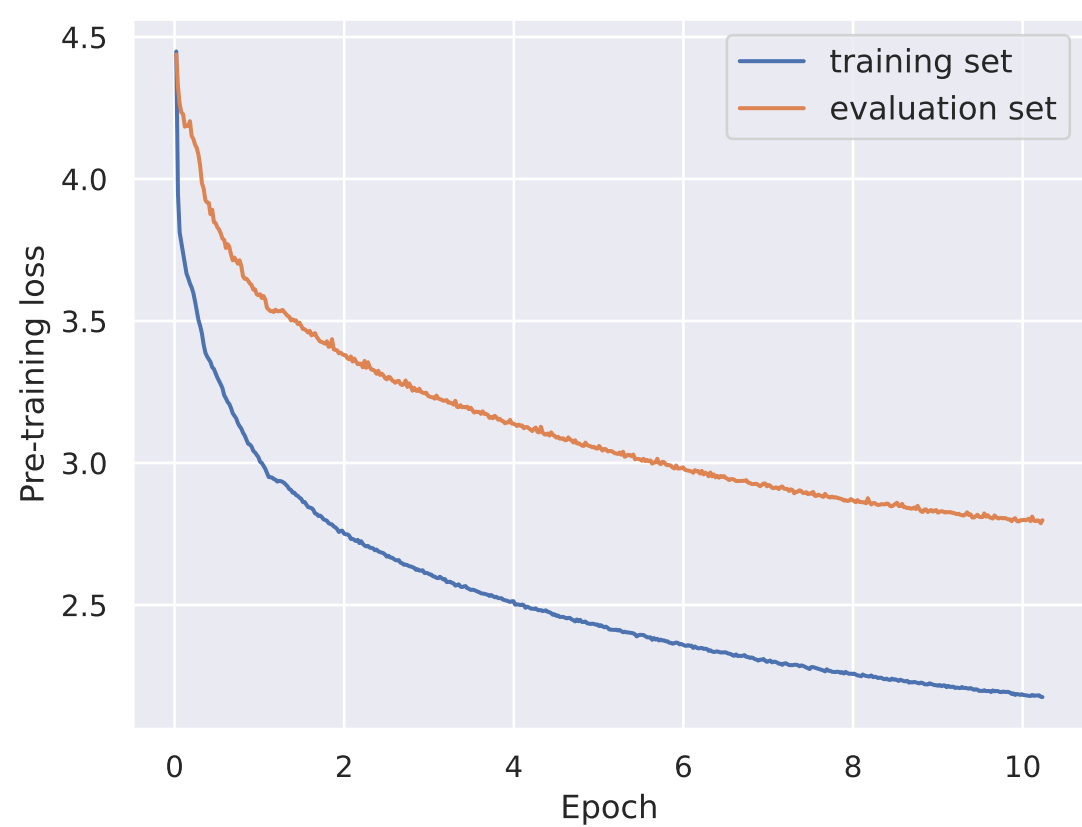

Supplement: Supplemental_Material.zip [file train_loss.pdf › SI/figs/train_loss.pdf]

12 x

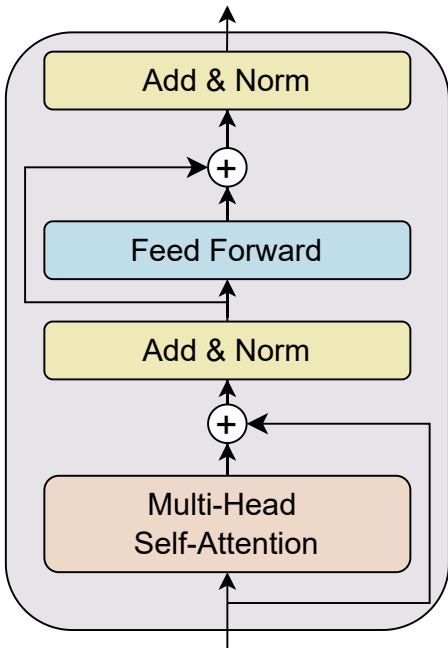

Supplement: Supplemental_Material.zip [file transformer_block.pdf › SI/figs/transformer_block.pdf]

UMAP Dimension 2

UMAP Dimension 1

K  
N  
I  
M  
R  
S  
T  
\*  
Y  
L  
F  
C  
W  
E  
D  
V  
G  
A  
Q  
H  
P

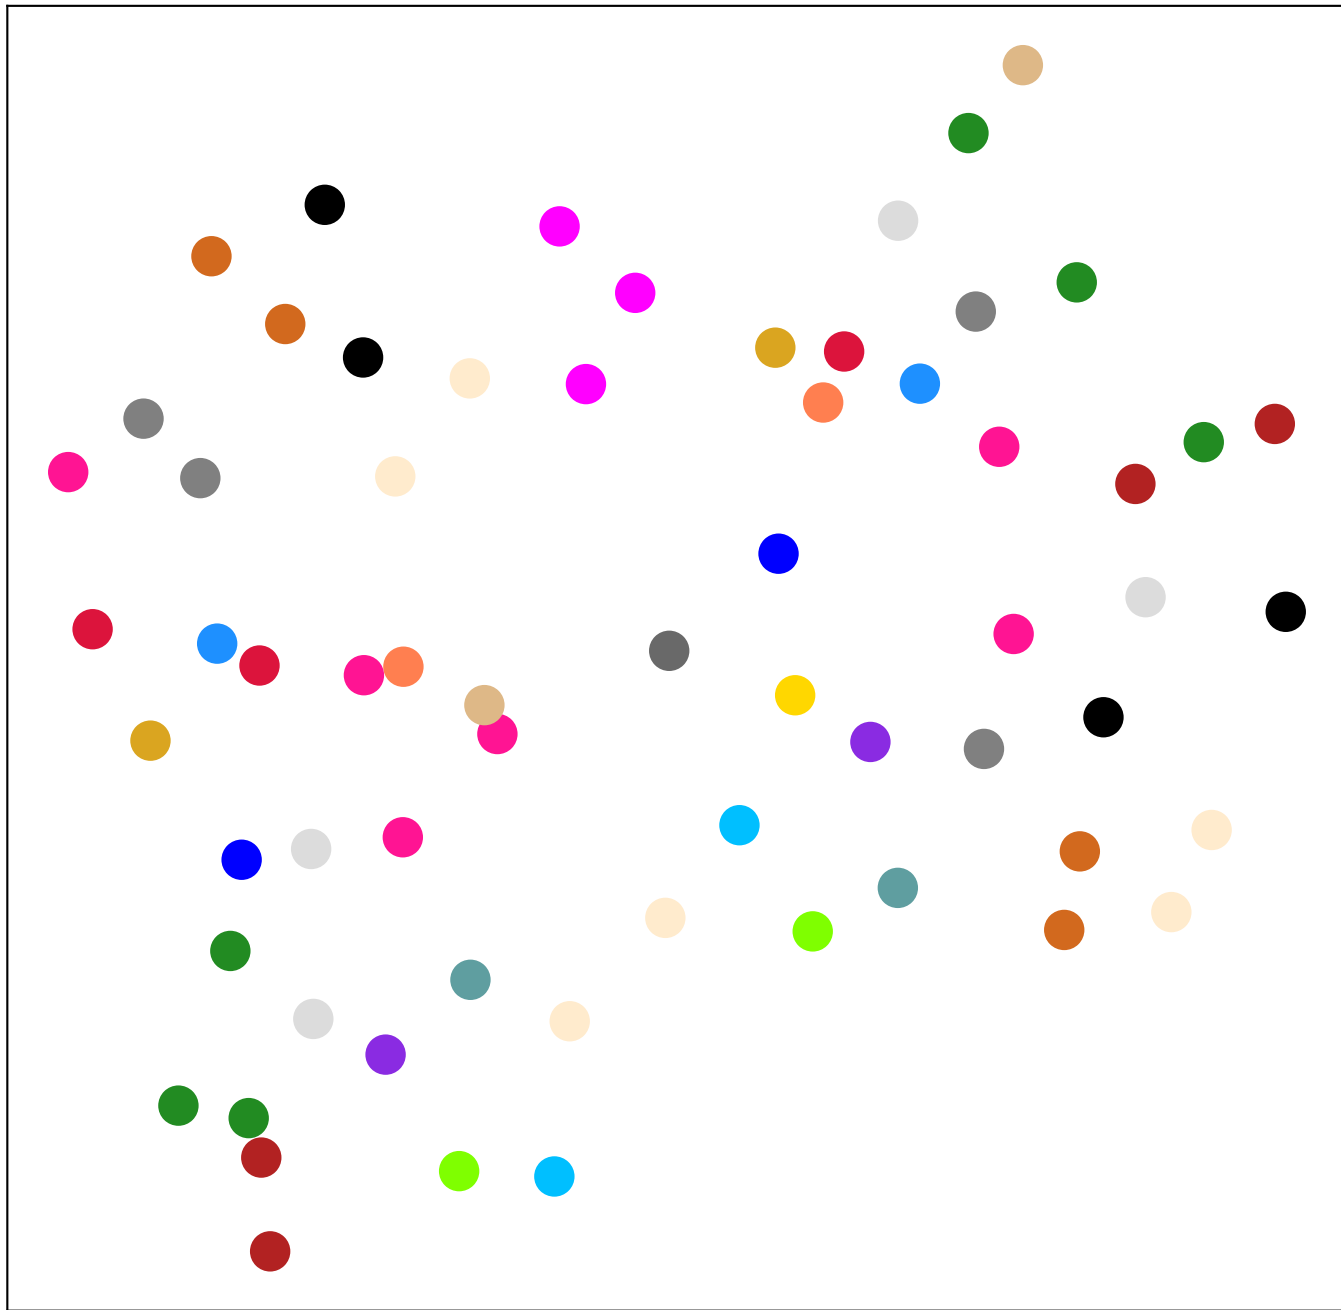

Supplement: Supplemental_Material.zip [file w2v_aa_cluster.pdf › SI/figs/w2v_aa_cluster.pdf]
